## Sodium and anion transport across the avian uterine (shell gland) epithelium

Alisen E. Vetter<sup>1</sup> and Scott M. O'Grady<sup>2,\*</sup>

<sup>1</sup>Cardiac Rhythm Management, Medtronic Corporation, 7000 Central Avenue NE, Minneapolis, MN 55432, USA and

<sup>2</sup>Departments of Physiology and Animal Science, University of Minnesota, 495 Animal Science/Veterinary Medicine Building, 1988 Fitch Avenue, St Paul, MN 55108, USA

\*Author for correspondence (e-mail: ograd001@umn.edu)

Accepted 24 November 2004

### Summary

The uterine (shell gland) epithelium from the domestic chicken was mounted in Ussing chambers, bathed in symmetric avian saline solution on both apical and basolateral aspects and voltage clamped at 0 mV. The epithelium exhibited a basal short circuit current ( $I_{sc}$ ) that was partially inhibited by the epithelial  $Na^+$  channel (ENaC) blockers, amiloride and benzamil ( $IC_{50}$  values of 0.8 and 0.12  $\mu\text{mol l}^{-1}$ , respectively). Inhibition of basal  $Na^+$  absorption by 10  $\mu\text{mol l}^{-1}$  amiloride was confirmed by measurements of transepithelial  $Na^+$  and  $Cl^-$  fluxes, where inhibition of the apical-to-basolateral and net  $Na^+$  flux occurred, but no significant effects on  $Cl^-$  fluxes were detected. The amiloride-insensitive portion of the basal  $I_{sc}$  was both  $Cl^-$  and  $HCO_3^-$  dependent and was inhibited by the  $Cl^-$  channel blocker, diphenyl-2-carboxylate (DPC; 100  $\mu\text{mol l}^{-1}$ ). Stimulation with 8-(4-chlorophenylthio)-cyclic 3'-5', adenosine monophosphate (8-cpt cAMP) produced a sustained increase in  $I_{sc}$  that was dependent on

both  $Cl^-$  and  $HCO_3^-$ . The magnitude of the amiloride-sensitive  $I_{sc}$  was approximately twofold greater in birds where shell formation was complete, but oviposition had not yet occurred. In addition, the amiloride-sensitive  $I_{sc}$  was greater in hens over the age of 55 weeks and in molting birds. The anion-dependent component of the basal  $I_{sc}$  was reduced in older birds, and electrogenic  $HCO_3^-$  transport was nearly absent in molting birds. These results demonstrated that electrogenic  $Na^+$  transport in avian shell gland was similar to the mammalian uterine epithelium and increased with age and during molting. Electrogenic  $Cl^-$  and  $HCO_3^-$  transport were coupled under basal and cAMP stimulated conditions and basal anion transport decreased with age and during molting.

Key words: eggshell formation, ENaC, bicarbonate secretion, acetazolamide, carbonic anhydrase, chicken, *Gallus domesticus*.

### Introduction

The eggshell plays an important role in the process of respiratory gas exchange in developing avian embryos. Its strength and porosity are essential for embryonic metabolism, development and resistance to bacterial infection (Bennett, 1992). Significant defects in shell integrity often result in death of the developing embryo (Bennett, 1992). Factors that influence the structure and composition of the eggshell include: calcium ( $Ca^{2+}$ ) secretion, bicarbonate ( $HCO_3^-$ ) secretion, protein content, vitamin D, vitamin C, phosphorus and various fatty acids (Eastin and Spaziani, 1978a). The major chemical component of the eggshell is calcium carbonate (97% by mass). The avian shell gland is responsible for the secretion of  $Ca^{2+}$  and  $HCO_3^-$  that combine within the shell gland lumen to form calcium carbonate or calcite (Eastin and Spaziani, 1978b). Presently, the mechanisms and regulation of monovalent ion absorption and secretion by the shell gland epithelium have not been characterized.

Previous studies of  $Na^+$  transport *in vivo* have demonstrated net absorption when the shell gland was perfused with plasma-like saline solution (Eastin and Spaziani, 1978b). Addition of

ouabain, an inhibitor of  $Na^+$ - $K^+$  ATPase activity, inhibited basal  $Na^+$  transport. *In vivo* studies also demonstrated net  $HCO_3^-$  secretion during shell formation that was inhibited by acetazolamide (Eastin and Spaziani, 1978a,b). This result suggested that  $HCO_3^-$  transport was dependent on carbonic anhydrase activity and that the mechanism for  $HCO_3^-$  uptake presumably involved  $CO_2$  diffusion across the plasma membrane. These findings also indicated that  $HCO_3^-$  secretion was transcellular rather than paracellular and involved transport pathways located within the apical membrane of the shell gland epithelium. Measurements of  $Cl^-$  transport *in vivo* showed net absorption under conditions where the shell gland was perfused with plasma-like saline solution.  $Cl^-$  absorption was inhibited when the gland was treated with ouabain or with acetazolamide (Eastin and Spaziani, 1978a,b). Thus  $Cl^-$  transport also appeared to be dependent on carbonic anhydrase activity and coupled to  $HCO_3^-$  secretion.

Earlier  $Ca^{2+}$  flux experiments demonstrated net  $Ca^{2+}$  secretion into the lumen of the shell gland that was dependent on the presence of  $HCO_3^-$  in the bathing solutions (Pearson and

Goldner, 1973, 1974; Pearson et al., 1977). Biochemical and histochemical studies suggested that a  $\text{Ca}^{2+}$ -ATPase, associated primarily with tubular gland epithelial cells, was involved in active  $\text{Ca}^{2+}$  secretion across the epithelium (Yamamoto et al., 1985; Coty, 1982; Gay and Schraer, 1971; Gay and Mueller, 1973). In addition, vitamin D-dependent calcium binding proteins were also localized to tubular gland epithelial cells, using immunohistochemical localization techniques (Lippiello and Wasserman, 1975). These results supported the hypothesis that the glandular epithelium was the site for  $\text{Ca}^{2+}$  secretion and that the mechanism of secretion involved an electrogenic  $\text{Ca}^{2+}$ -ATPase located in the apical membrane of these cells. The basis for the  $\text{HCO}_3^-$  dependency of  $\text{Ca}^{2+}$  secretion was not determined.

Egg production rates and eggshell thickness both decrease with age (Bahr and Palmer, 1989; Joyner et al., 1987). Associated with these changes are decreases in the levels of vitamin  $1\alpha,25(\text{OH})_2\text{D}_3$  and the mass of medullary bone in older hens (Bahr and Palmer, 1989). Vitamin  $1\alpha,25(\text{OH})_2\text{D}_3$  is synthesized from cholecalciferol through hydroxylation by the liver and kidney (Soares and Ottinger, 1988). The active metabolite ( $1\alpha,25(\text{OH})_2\text{D}_3$ ) regulates calcium metabolism by increasing intestinal  $\text{Ca}^{2+}$  absorption, and by increasing the mobilization of  $\text{Ca}^{2+}$  from bone (Bahr and Palmer, 1989). Its synthesis by the kidney is regulated by estrogen (Bar and Hurwitz, 1987; Baksi and Kenny, 1977). It is interesting to note that  $1\alpha,25(\text{OH})_2\text{D}_3$  concentration decreases with age even though plasma levels of progesterone and estradiol- $17\beta$  are similar in young and older hens (Bar and Hurwitz, 1987). Moreover, plasma levels of ionized  $\text{Ca}^{2+}$  do not significantly change in hens between 33 and 122 weeks of age (Bahr and Palmer, 1989). Thus, the reasons for decreased eggshell thickness may involve changes in shell gland function rather than availability of  $\text{Ca}^{2+}$  for secretion. Such changes could involve a decrease in the ability of the epithelium to transport  $\text{Ca}^{2+}$  directly or perhaps changes in the coupling of  $\text{Ca}^{2+}$  transport with  $\text{HCO}_3^-$  secretion across the epithelium.

The objective of the present study was to investigate the  $\text{Na}^+$  and  $\text{Cl}^-$  transport properties of the shell gland epithelium from the domestic chicken *Gallus domesticus* under *in vitro* conditions where transepithelial voltage and ion concentration gradients could be controlled. Transepithelial  $\text{Na}^+$  and  $\text{Cl}^-$  flux measurements and ion substitution experiments were performed to determine the ionic basis of the basal short circuit current  $I_{\text{sc}}$ . The effects of epithelial  $\text{Na}^+$  and  $\text{Cl}^-$  channel blockers were tested to identify apical membrane conductance pathways for these ions. The effects of cAMP on ion transport was determined using a cell-permeant cAMP analog and the effects of age and molting on both basal  $\text{Na}^+$  and anion transport were examined. The results showed that electrogenic transepithelial  $\text{Na}^+$  absorption was dependent on amiloride-sensitive  $\text{Na}^+$  channels present in the apical membrane and that a significant portion of the basal  $I_{\text{sc}}$  was dependent on  $\text{Cl}^-$  and  $\text{HCO}_3^-$ . The data also indicated that rates of  $\text{Na}^+$  and anion transport were altered with age and during molting, which could potentially contribute to the

decrease in shell thickness often associated with eggs from older birds.

## Materials and methods

### Materials

Benzamil was purchased from Molecular Probes, Eugene, OR, USA. Tetrodotoxin and 8-chloro-phenyl-thio-cAMP (8-cpt cAMP) were purchased from Research Biochemicals International, Natick, MA, USA. Amiloride, indomethacin and 4,4'-diisothiocyanatostilbene-2,2'-disulfonic acid (DIDS) were obtained from Sigma-Aldrich, St Louis MO, USA. Diphenyl-2-carboxylate (DPC) was purchased from Fluka, Milwaukee, WI, USA.

### Histology

Freshly isolated, intact shell gland mucosa was cut into  $1\text{ cm}^2$  pieces and fixed in 10% buffered formalin prior to paraffin embedding. The embedded tissue was cut into 3–5  $\mu\text{m}$  sections and stained with Hematoxylin and Eosin. Slides were examined using a compound microscope (Nikon diaphot, Niles, IL, USA) and images acquired with a digital camera (Coolsnap, Millersville, MD, USA) at  $100\times$  (Fig. 1A) and  $400\times$  (Fig. 1B).

### Tissue preparation and measurement of electrical parameters

Domestic chickens *Gallus domesticus* L. were maintained at the Animal Care Facility in the College of Veterinary Medicine at the University of Minnesota under a 12 h:12 h light:dark cycle. Hens were pre-anesthetized by an intramuscular injection of ketamine ( $10\text{ mg kg}^{-1}$ ) followed by intravenous administration of Beuthanasia solution ( $4\text{ ml kg}^{-1}$ ) containing  $50\text{ mg ml}^{-1}$  pentobarbital. The shell gland was subsequently removed and bathed in ice-cold avian saline solution containing (in  $\text{mmol l}^{-1}$ ) 150 NaCl, 5 KCl, 1  $\text{CaCl}_2$ , 1  $\text{MgCl}_2$ , 25  $\text{NaHCO}_3$ , 1  $\text{NaH}_2\text{PO}_4$ , pH 7.4. The serosal muscle layers were removed by blunt dissection. The mucosa was mounted in Ussing chambers and bathed with avian saline solution on both sides of the tissue. The solutions were gassed with 95%  $\text{O}_2/5\%$   $\text{CO}_2$  and maintained at  $40^\circ\text{C}$  (avian core temperature). Transepithelial potential difference ( $3.0\pm0.22\text{ mV}$ ,  $N=30$ ), tissue conductance ( $17.3\pm0.62\text{ mS cm}^2$ ,  $N=30$ ) and short circuit current ( $I_{\text{sc}}$ ;  $71.7\pm5.1\text{ }\mu\text{A cm}^{-2}$ ,  $N=30$ ) were measured with the ground electrode placed in the luminal solution, using voltage clamp circuitry from JWT Engineering Corporation (Kansas City, KS, USA). The chamber area was  $0.64\text{ cm}^2$ . For experiments that involved anion substitutions,  $\text{Cl}^-$  was replaced with methane sulfonate and  $\text{HCO}_3^-$  with Hepes buffer to maintain a constant pH of 7.4. Tissue conductance was calculated from voltage and current measurements obtained at various intervals throughout the experiment. Glucose ( $10\text{ mmol l}^{-1}$ ) was added to the basolateral solution to sustain the metabolic activity of the tissue, and mannitol ( $10\text{ mmol l}^{-1}$ ) was added to the apical solution to balance osmotic pressure without stimulating  $\text{Na}^+$ -dependent glucose transport mechanisms that might exist within the apical membrane. In

all experiments,  $100 \text{ nmol l}^{-1}$  tetrodotoxin and  $10 \text{ } \mu\text{mol l}^{-1}$  indomethacin were added to the basolateral solution to block any spontaneous activity of submucosal nerves and to inhibit basal prostaglandin secretion from the epithelium and stromal cells.

#### *Transepithelial $\text{Na}^+$ and $\text{Cl}^-$ flux measurements*

Tissues were prepared as described above. All flux measurements were performed on tissues under short circuit conditions. After allowing 30 min for the tissues to stabilize,  $5.5 \times 10^4 \text{ Bq } ^{22}\text{Na}^+$  and  $1.1 \times 10^5 \text{ Bq } ^{36}\text{Cl}^-$  were added to either the luminal or basolateral side of the epithelium and allowed to equilibrate for 30 min. The first flux period (30 min duration) served as a control to establish basal rates of  $\text{Na}^+$  and  $\text{Cl}^-$  transport across the epithelium. Unidirectional fluxes were determined from measurements of isotope (0.1 ml) recovered from the reservoir where isotope was initially added and from 1.0 ml of saline solution from the opposite reservoir. Subsequently, the epithelium was treated with  $10 \text{ } \mu\text{mol l}^{-1}$  amiloride for 5 min, and a second 30 min flux measurement was performed.  $^{22}\text{Na}^+$  was measured using an LKB gamma counter and  $^{36}\text{Cl}^-$  was detected using a Beckman liquid scintillation counter. The net flux across the epithelium was determined by subtracting the basolateral-to-apical unidirectional flux from the apical-to-basolateral flux using paired tissues from the same animal. Tissues were paired on the basis of transepithelial conductance within 10%.

#### *Statistics*

Results are presented as the mean  $\pm$  standard error (S.E.M.). For statistical comparisons of flux data and  $I_{\text{sc}}$  responses between tissues obtained before and after ion replacement or drug treatment (where the same tissue was used as control), a paired *t*-test was used. An unpaired *t*-test was used for comparisons between  $I_{\text{sc}}$  responses from animals in different age groups or during molting. The level of significance was set at  $P < 0.05$ .

#### **Results**

Figure 1 shows a cross section of shell gland mucosa and associated smooth muscle layers. The mucosa is composed of a pseudostratified surface epithelium and glandular epithelium. The interstitium is composed of various matrix elements and stromal cells, which are specialized fibroblasts that closely associate with the surface and glandular epithelium. Circular and longitudinal smooth muscle layers are visible at the bottom of the section. These muscle layers were removed prior to mounting in Ussing chambers.

The shell gland epithelium exhibited a basal  $I_{\text{sc}}$  that ranged from  $40\text{--}100 \text{ } \mu\text{A}$  depending on the stage of egg production. Addition of the  $\text{Na}^+$  channel blockers amiloride or benzamil to the apical bathing solution produced inhibition of the basal current by approximately 60–70%. Inhibition of  $I_{\text{sc}}$  was concentration dependent for both blockers with  $\text{IC}_{50}$  values and a rank order of potency consistent with inhibition of ENaC  $\text{Na}^+$

channels (Fig. 2). Interestingly, the magnitude of amiloride-sensitive  $I_{\text{sc}}$  was nearly twofold greater in birds following completion of shell formation compared to hens where shell deposition was incomplete.

To confirm that the decrease in  $I_{\text{sc}}$  produced by apical addition of amiloride was a consequence of inhibition of  $\text{Na}^+$  absorption, transepithelial  $\text{Na}^+$  and  $\text{Cl}^-$  fluxes were measured (Fig. 3). These experiments were performed under short circuit conditions where the transepithelial voltage was clamped at 0 mV and identical saline solution was used on both sides of the tissue. Amiloride ( $10 \text{ } \mu\text{mol l}^{-1}$ ) produced a significant decrease in the apical-to-basolateral unidirectional flux and in

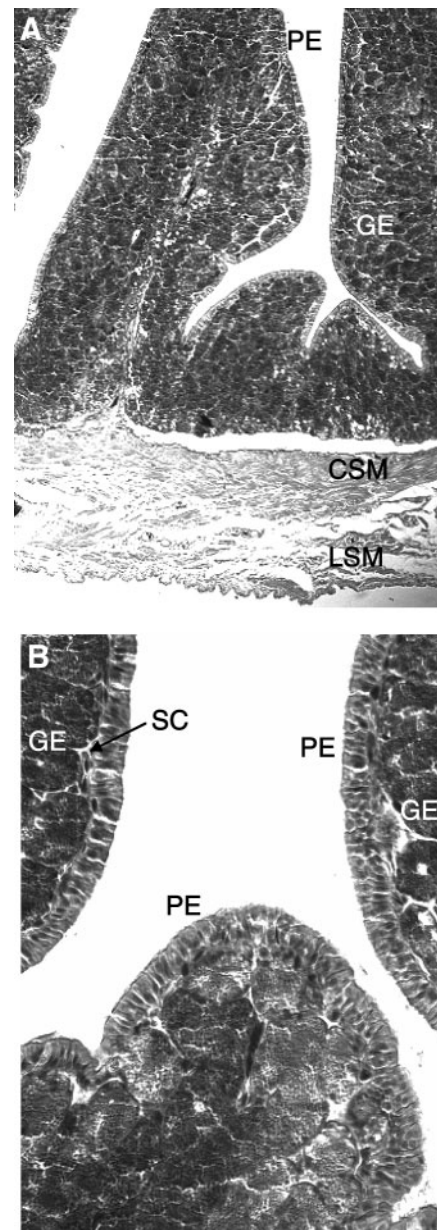

Fig. 1. Histology of the shell gland mucosa. (A)  $100\times$  magnification, (B)  $400\times$  magnification. PE, pseudostratified surface epithelium; GE, glandular epithelium; SC, stromal cells; CSM, circular smooth muscle; LSM, longitudinal smooth muscle.

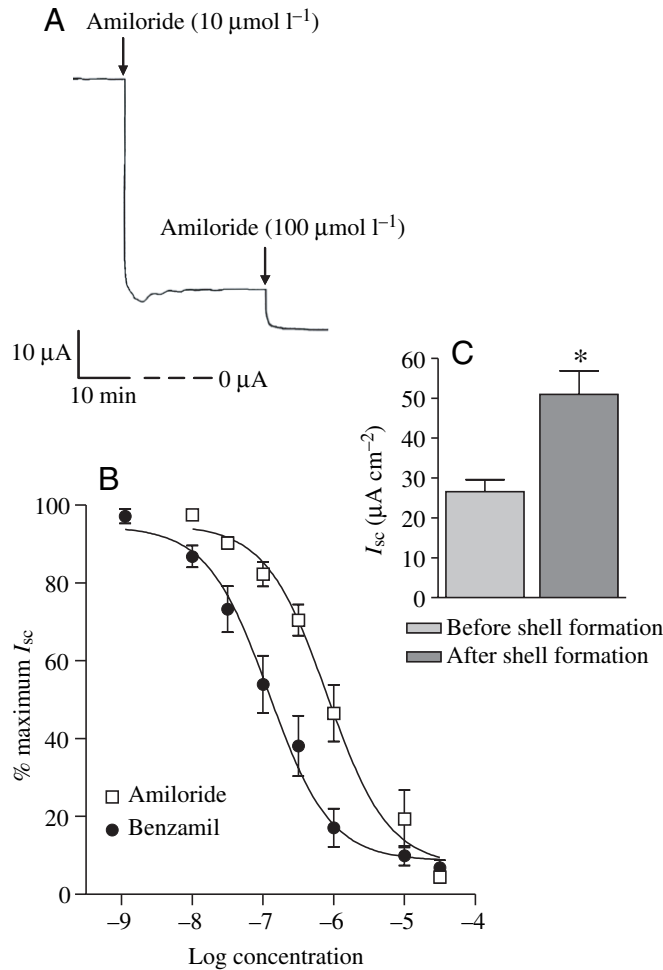

Fig. 2. Effects of apical  $Na^+$  channel blockers on basal  $I_{sc}$ . (A) Time course of  $I_{sc}$  inhibition following sequential treatment with 10 and 100  $\mu mol\ l^{-1}$  amiloride. (B) Concentration-response relationships for amiloride and benzamil on basal  $I_{sc}$ . The data was fitted using a four-parameter logistic function and the  $IC_{50}$  values were 120  $nmol\ l^{-1}$  ( $N=5$ ) and 810  $nmol\ l^{-1}$  ( $N=5$ ) for benzamil and amiloride, respectively. (C) Magnitudes of amiloride-sensitive (10  $\mu mol\ l^{-1}$ )  $I_{sc}$  in tissues from hens where shell formation was complete ( $N=6$ ) compared to tissues where the egg had not entered the shell gland ( $N=5$ ). \*Significantly different from control value ( $P<0.05$ ).

the net flux for  $Na^+$ . However, treatment with amiloride did not completely block all of the net  $Na^+$  flux, suggesting that  $Na^+$  channel activity was not completely blocked at 10  $\mu mol\ l^{-1}$  (consistent with the additional decrease in  $I_{sc}$  observed with 100  $\mu mol\ l^{-1}$  amiloride in Fig. 2C) or that electroneutral pathways for  $Na^+$  transport exist in the apical membrane. No significant effects of amiloride were observed on unidirectional or net  $Cl^-$  fluxes.

Ion replacement experiments indicated that the basal, amiloride-insensitive  $I_{sc}$  was both  $Cl^-$  and  $HCO_3^-$  dependent (Fig. 4). In addition, treatment with the  $Cl^-$  channel blocker, DPC, produced a concentration dependent decrease in  $I_{sc}$  that was quantitatively similar to the  $Cl^-$  and  $HCO_3^-$  dependent current (Fig. 4B). Moreover, transepithelial  $Cl^-$  flux

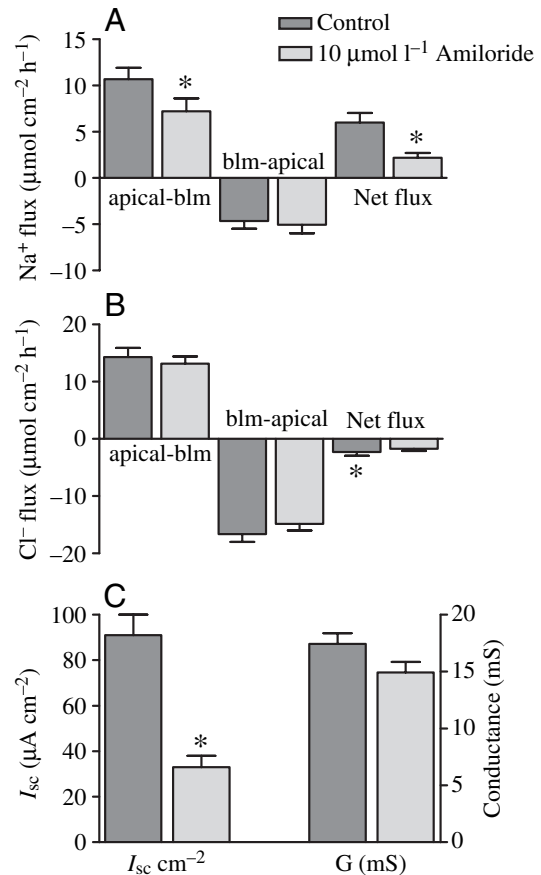

Fig. 3. Transepithelial  $Na^+$  and  $Cl^-$  flux measurements before and after apical treatment with 10  $\mu mol\ l^{-1}$  amiloride. (A) Unidirectional, apical-to-basolateral (apical-blm), basolateral-to-apical (blm-apical) and net ((apical-blm)-(blm-apical))  $Na^+$  fluxes across epithelial tissues bathed in symmetric avian saline solution and voltage clamped at 0 mV ( $N=6$ ). (B) Unidirectional and net  $Cl^-$  fluxes across under the same conditions stated in A ( $N=5$ ). (C) Effects of apical amiloride (10  $\mu mol\ l^{-1}$ ) on  $I_{sc}$  and conductance (G) measurements obtained from tissues used in the transepithelial flux experiments. \*Significantly different from control value ( $P<0.05$ ).

experiments showed a net  $Cl^-$  flux, indicating  $Cl^-$  secretion that was significantly different from zero under basal conditions. Basolateral addition of 8-cpt cAMP produced a rapid and sustained increase in  $I_{sc}$  that was dependent on  $Cl^-$  and  $HCO_3^-$  in the bathing solutions (Fig. 5). Addition of the acetazolamide (100  $\mu mol\ l^{-1}$ ) to both apical and basolateral bathing solutions reduced most of the residual cAMP-stimulated  $I_{sc}$  under  $Cl^-$  free conditions, suggesting that  $HCO_3^-$  secretion was responsible for the residual current (Fig. 5B).

The effects of age and molting on basal, electrogenic  $Na^+$  and anion transport are shown in Fig. 6. The amiloride-sensitive  $I_{sc}$  increased with age and during molting (Fig. 6A). In contrast, the anion-dependent basal current was significantly decreased in older birds (Fig. 6B). Interestingly, molting birds exhibited a basal  $Cl^-$  dependent  $I_{sc}$  similar to that observed for hens within the 55–72 week age group, but the  $HCO_3^-$  dependency was significantly lower. This result is consistent



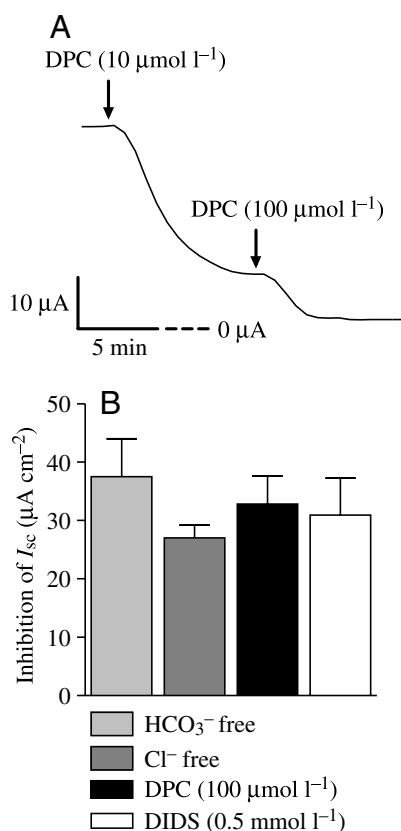

Fig. 4. Effects of symmetric anion substitution and apical addition of DPC on basal  $I_{\text{sc}}$ . (A)  $I_{\text{sc}}$  trace showing the inhibitory effects of 10  $\mu\text{mol l}^{-1}$  and 100  $\mu\text{mol l}^{-1}$  DPC on basal anion current in a tissue pretreated with 100  $\mu\text{mol l}^{-1}$  amiloride. (B) Magnitude of basal  $I_{\text{sc}}$  inhibition produced by apical DPC, 100  $\mu\text{mol l}^{-1}$  ( $N=5$ ),  $\text{Cl}^{-}$  replacement with methanesulfonate ( $N=7$ ),  $\text{HCO}_3^{-}$  replacement with Hepes ( $N=6$ ) and 0.5 mmol l<sup>-1</sup> DIDS added to the apical solution ( $N=5$ ).

with the interpretation that  $\text{Cl}^{-}$  secretion uncouples from  $\text{HCO}_3^{-}$  transport in molting birds.

### Discussion

The results of this study demonstrated that the shell gland epithelium was capable of high rates of electrogenic  $\text{Na}^{+}$  transport and that  $\text{Na}^{+}$  absorption was regulated during shell formation. The observation that amiloride and benzamil produced inhibition of the basal  $I_{\text{sc}}$  and that this decrease in current was associated with inhibition of the apical-to-basolateral and net  $\text{Na}^{+}$  flux strongly suggested that ENaC  $\text{Na}^{+}$  channels were involved in  $\text{Na}^{+}$  absorption across this epithelium. This result was consistent with previous studies of  $\text{Na}^{+}$  transport across the porcine, murine and human endometrial epithelium (Vetter and O'Grady, 1996; Deachapunya et al., 1999; Palmer-Densmore et al., 2002; Chan et al., 2001; Matthews et al., 1998). In native porcine endometrial tissues mounted in Ussing chambers, the surface epithelial cells exhibited a basal  $I_{\text{sc}}$  that was blocked by

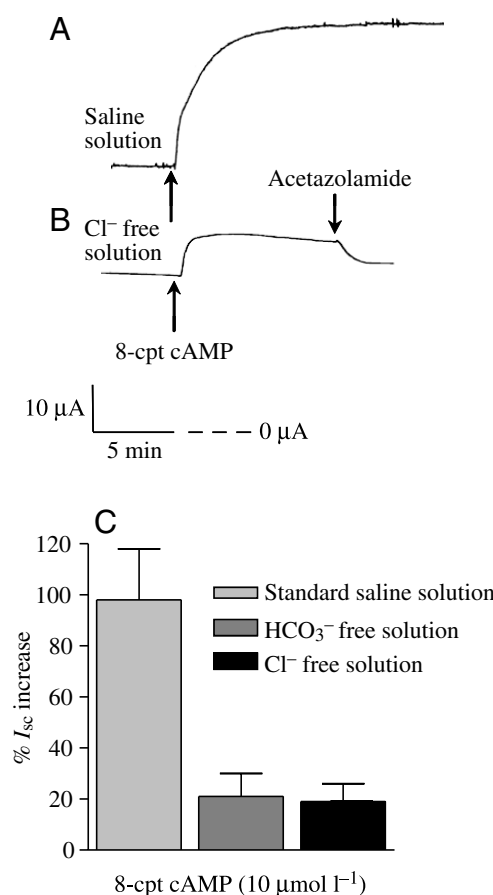

Fig. 5. Effects of 8-cpt cAMP (added to both sides) on  $I_{\text{sc}}$ . (A) Tracing showing the sustained increase in  $I_{\text{sc}}$  observed after stimulation with 10  $\mu\text{mol l}^{-1}$  8-cpt cAMP. (B) Effects of 10  $\mu\text{mol l}^{-1}$  8-cpt cAMP on  $I_{\text{sc}}$  under  $\text{Cl}^{-}$  free conditions. Note the inhibitory effects of 10  $\mu\text{mol l}^{-1}$  acetazolamide (an inhibitor of carbonic anhydrase activity) on the residual current. (C) Effects of  $\text{Cl}^{-}$  ( $N=5$ ) and  $\text{HCO}_3^{-}$  ( $N=5$ ) substitution on the 8-cpt cAMP stimulated  $I_{\text{sc}}$  response.

amiloride with an  $\text{IC}_{50}$  value (0.8  $\mu\text{mol l}^{-1}$ ) identical to that reported for the shell gland epithelium in this study (Vetter and O'Grady, 1996). Similar effects of amiloride and benzamil on basal  $I_{\text{sc}}$  were reported for cultured porcine glandular endometrial epithelial cells maintained under serum-free conditions (Deachapunya et al., 1999). Analysis of tissue morphology (Fig. 1) indicated the presence of lamellae that were clearly distinct from the mucosal morphology of mammalian endometrium (Vetter and O'Grady, 1996). Whether  $\text{Na}^{+}$  absorption and anion secretion are associated with separate cell types within the shell gland epithelium is unknown at this time.

An interesting observation from this study was the approximate twofold increase in amiloride-sensitive  $I_{\text{sc}}$  that occurred in birds where shell formation was complete. One possible reason for this increase in  $\text{Na}^{+}$  absorption may be to reduce fluid volume within the shell gland lumen and to recover the  $\text{Na}^{+}$  and  $\text{Cl}^{-}$  that were transported across the epithelium during shell deposition. This interpretation is

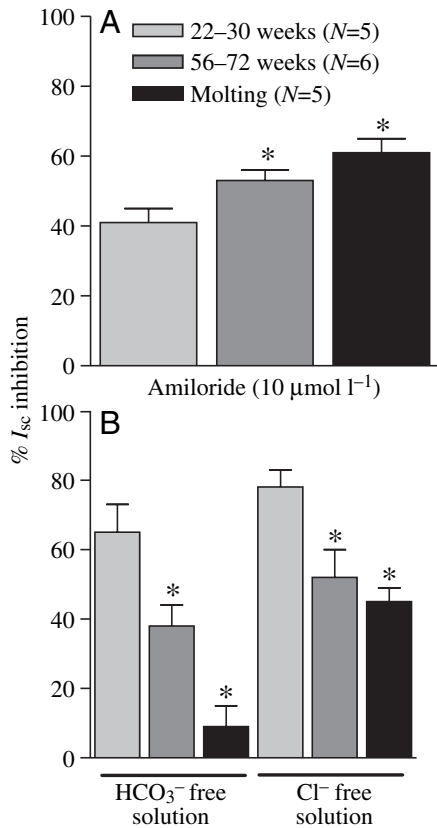

Fig. 6. Effects of age and molting on basal amiloride-sensitive and anion-dependent  $I_{sc}$ . Note that all experiments were performed in standard avian saline solution. (A) Changes in the amiloride-sensitive  $I_{sc}$  with age and molting. (B) Changes in the  $\text{Cl}^-$  and  $\text{HCO}_3^-$  dependent  $I_{sc}$  with age and molting. \*Significantly different from control value ( $P < 0.05$ ).

consistent with earlier results from *in situ* perfused shell gland experiments where net decreases in luminal  $\text{Na}^+$  and  $\text{Cl}^-$  concentrations were observed (Eastin and Spaziani, 1978a). Moreover, previous studies of  $\text{Na}^+/\text{K}^+$  ATPase expression in chicken shell gland showed that mRNA levels of the  $\alpha 1$  subunit varied depending on the stage of shell formation and exhibited different expression patterns within the surface pseudostratified epithelium and the glandular epithelium (Lavelin et al., 2001). The  $\alpha 1$  subunit mRNA levels were relatively low prior to entry of the egg into the shell gland. Maximum increases in mRNA expression were subsequently detected during the period of peak shell deposition and rapidly decreased once shell formation was complete, 1 h prior to oviposition. Although changes in  $\alpha 1$  subunit protein expression were not measured, it is reasonable to assume that changes in mRNA levels preceded changes in functional activity of the enzyme. Given this assumption, the increase in amiloride-sensitive  $I_{sc}$  observed in this study appeared to correlate with the enhanced expression of the Na-K ATPase  $\alpha 1$  subunit. Whether a similar increase in  $\text{Na}^+$  channel expression also occurred is possible, but remains to be established.

Anion substitution experiments revealed that the shell gland

epithelium exhibited a basal anion dependent  $I_{sc}$  consistent with anion secretion. Apical addition of the  $\text{Cl}^-$  channel blocker DPC inhibited the  $\text{Cl}^-$  and  $\text{HCO}_3^-$  dependent current, again suggesting net anion secretion under basal conditions. It is worth noting in these experiments that tissues were pretreated with apical amiloride to block basal  $\text{Na}^+$  channel activity and to ensure that changes in  $I_{sc}$  produced by DPC were not partially due to effects on the driving force for  $\text{Na}^+$  uptake across the apical membrane. Although DPC is a well established inhibitor of  $\text{Cl}^-$  channel activity, it is not highly selective, thus the molecular identity of the DPC-sensitive conductance in the apical membrane could not be determined. The suggestion that anion substitution and DPC inhibition of  $I_{sc}$  represented effects on basal anion secretion was supported by measurements of transepithelial  $\text{Cl}^-$  fluxes, which demonstrated net  $\text{Cl}^-$  secretion under basal conditions. Moreover, stimulation with 8-cpt cAMP produced a sustained increase in  $I_{sc}$  that was significantly reduced if either  $\text{Cl}^-$  or  $\text{HCO}_3^-$  were replaced in the bathing solutions. Attempts to measure transepithelial  $\text{Cl}^-$  fluxes following treatment with 8-cpt cAMP were confounded by increases in both unidirectional  $\text{Cl}^-$  fluxes (ranging between 20–30%), making it difficult to measure changes in the net flux accurately. Thus we were unable to confirm cAMP stimulation of net  $\text{Cl}^-$  secretion using isotopic flux measurements. However, under symmetric saline solution conditions,  $I_{sc}$  responses to 8-cpt cAMP were stable in spite of changes in paracellular permeability, thus ion substitution experiments could be performed to investigate the anion dependence of the cAMP response. Based on these findings, we speculate that the elevated  $I_{sc}$  resulting from cAMP stimulation was due to an increase in anion secretion. Regulation of shell formation through the cAMP signaling cascade could conceivably be mediated by various autocrine factors including prostaglandins and adenosine or by certain hormones such as vasopressin and oxytocin (Saito et al., 1987; Olson et al., 1978). However, the specific signaling molecules involved in regulation of  $\text{Cl}^-$  and  $\text{HCO}_3^-$  transport by the shell gland epithelium have not been identified.

The observation that a portion of the basal  $I_{sc}$  and the 8-cpt cAMP stimulated  $I_{sc}$  were both  $\text{Cl}^-$  and  $\text{HCO}_3^-$  dependent suggested that transport of these anions may be coupled, as described for pancreatic duct cells that secrete  $\text{HCO}_3^-$  (Steward et al., 2005). In these cells, the apical membrane contains both cAMP activated  $\text{Cl}^-$  channels and  $\text{Cl}^-/\text{HCO}_3^-$  exchangers.  $\text{Cl}^-$  channels provide a pathway for  $\text{Cl}^-$  recycling across the apical membrane to sustain  $\text{HCO}_3^-$  efflux mediated by  $\text{Cl}^-/\text{HCO}_3^-$  exchange activity. In the shell gland epithelium, we propose that a mechanism for  $\text{Cl}^-$  uptake across the basolateral membrane must also exist to allow for transcellular  $\text{Cl}^-$  secretion. Net  $\text{Cl}^-$  secretion would presumably be necessary to maintain a luminal  $[\text{Cl}^-]$  sufficient to support  $\text{HCO}_3^-$  transport by  $\text{Cl}^-/\text{HCO}_3^-$  exchange and to compensate for paracellular absorption of  $\text{Cl}^-$  resulting from the lumen-positive transepithelial potential. To test this hypothesis, DIDS, an inhibitor of  $\text{Cl}^-/\text{HCO}_3^-$  exchange, was added to the apical solution to see if it blocked the  $\text{HCO}_3^-$  dependent component

of the basal  $I_{sc}$ . We observed a decrease in  $I_{sc}$  of  $31 \pm 6.3 \mu A$  ( $N=5$ ) that was abolished when tissues were bathed on both sides with  $HCO_3^-$  free saline solution. Although this result appears to be consistent with the suggested model above it is important to note that DIDS also blocks certain types of  $Cl^-$  channels, thus more direct methods will be required to establish the mechanism of  $HCO_3^-$  secretion in this epithelium.

Stimulation of  $Cl^-$  secretion by 8-cpt cAMP was previously reported in cultured mammalian endometrial epithelial cells (Deachapunya and O'Grady, 1998). However, native porcine endometrial tissues mounted in Ussing chambers and treated with 8-cpt cAMP or with  $PGF2\alpha$ , produced a sustained increase in amiloride-sensitive  $Na^+$  absorption (Vetter and O'Grady, 1996; Vetter et al., 1997). This increase in  $Na^+$  transport was not associated with an increase in apical  $Na^+$  conductance, but appeared to be the result of an increase in driving force for apical  $Na^+$  uptake produced by activation of basolateral  $K^+$  channels (Vetter et al., 1997).

Decreases in eggshell quality resulting from a reduction in shell thickness is a well-known problem in egg production (Bahr and Palmer, 1989; Bennett, 1992; Hughes et al., 1986; Joyner et al., 1977; Poggenpoel, 1986; Soares et al., 1988). In the present study, significant decreases in basal anion transport were observed in birds older than 55 weeks. Moreover, in molting birds there appeared to be significant downregulation of basal  $HCO_3^-$  transport that was associated with the overall regression of the reproductive tract. To date, no direct evidence for age-dependent decreases in  $Ca^{2+}$  secretion by the shell gland epithelium have been reported, but reductions in  $HCO_3^-$  secretion have been shown to significantly decrease calcite deposition. Limiting  $HCO_3^-$  secretion by reducing plasma  $CO_2$ , which can occur in heat-stressed birds, or by treating hens with carbonic anhydrase inhibitors, typically leads to reduced shell thickness (Hughes et al., 1986; Odom et al., 1986; Mashaly et al., 2004; Lavelin et al., 2001). Thus decreased rates of  $HCO_3^-$  secretion may contribute to the problem of poor shell quality often observed in older birds.

In summary, the results of this study support the following conclusions. First, the shell gland epithelium actively transports  $Na^+$  by an electrogenic mechanism that involves apical, amiloride-sensitive  $Na^+$  channels. We propose that this mechanism of  $Na^+$  transport is necessary for reclaiming  $Na^+$ ,  $Cl^-$  and fluid from the shell gland lumen following completion of calcite deposition. Second, the shell gland epithelium exhibits basal anion secretion, which can be stimulated by signaling molecules that increase intracellular [cAMP]. We speculate that rates of  $HCO_3^-$  secretion are regulated by changes in intracellular [cAMP] during the process of shell formation and that this is necessary for delivery of adequate amounts of  $HCO_3^-$  required for shell deposition. Finally, we conclude that anion transport decreases in older hens and speculate that this may have important consequences on shell thickness.

This work was supported by the Minnesota Agriculture Experiment Station awarded to S.M.O.

## References

- Bahr, J. M. and Palmer, S. S. (1989). The influence of aging on ovarian function. *Poult. Sci.* **2**, 103-110.
- Baksi, S. M. and Kenny, A. D. (1977). Vitamin D<sub>3</sub> metabolism in immature Japanese quail: effect of ovarian hormones. *Endocrinol.* **10**, 1216-1221.
- Bar, A. and Hurwitz, S. (1987). Vitamin D metabolism and calbindin (calcium-binding protein) in aged laying hens. *J. Nutr.* **117**, 1775-1779.
- Bennett, C. D. (1992). The influence of shell thickness on hatchability in commercial broiler breeder flocks. *J. Appl. Poultry Res.* **1**, 61-65.
- Chan, L. N., Wang, X. F., Tsang, L. L., So, S. C., Chung, Y. W., Liu, C. Q. and Chan, H. C. (2001). Inhibition of amiloride-sensitive  $Na^+$  absorption by activation of CFTR in mouse endometrial epithelium. *Pflug. Arch.* **443**, S132-S136.
- Coty, W. A. (1982). The hen oviduct shell gland contains high levels of calcium-stimulated ATPase activity. *Fed. Proc.* **41**, 463.
- Deachapunya, C. and O'Grady, S. M. (1998). Regulation of chloride secretion across porcine endometrial epithelial cells by prostaglandin E<sub>2</sub>. *J. Physiol.* **508**, 31-47.
- Deachapunya, C., Palmer-Densmore, M. and O'Grady, S. M. (1999). Insulin stimulates transepithelial sodium transport by activation of a protein phosphatase that increases  $Na^+$ - $K^+$  ATPase activity in endometrial epithelial cells. *J. Gen. Physiol.* **114**, 561-574.
- Eastin, W. C. and Spaziani, E. (1978a). On the control of calcium secretion in the avian shell gland (uterus). *Biol. Reprod.* **19**, 493-504.
- Eastin, W. C. and Spaziani, E. (1978b). On the mechanism of calcium secretion in the avian shell gland (uterus). *Biol. Reprod.* **19**, 505-518.
- Gay, C. V. and Schraer, H. (1971). Autoradiographic localization of calcium in the mucosal cells of the avian oviduct. *Cell Tissue Res.* **7**, 201-211.
- Gay, C. V. and Mueller, W. J. (1973). Cellular localization of carbonic anhydrase in avian tissues by labeled inhibitor autoradiography. *J. Histochem. Cytochem.* **21**, 693-702.
- Hughes, B. O., Gilbert, A. B. and Brown, M. F. (1986). Categorisation and causes of abnormal egg shells: relationship with stress. *Br. Poult. Sci.* **27**, 325-337.
- Joyner, C. J., Peddie, M. J. and Taylor, T. G. (1987). The effect of age on egg production in the domestic hen. *Gen. Comp. Endocrinol.* **65**, 331-336.
- Lavelin, L., Meiri, N., Genina, O., Alexiev, R. and Pines, M. (2001).  $Na^+$ - $K^+$ -ATPase gene expression in the avian eggshell gland: distinct regulation in different cell types. *Am. J. Physiol.* **281**, R1169-R1176.
- Lippielo, L. and Wasserman, R. H. (1975). Fluorescent antibody localization of the vitamin D-dependent calcium-binding protein in the oviduct of the laying hen. *J. Histochem. Cytochem.* **23**, 111-116.
- Mashaly, M. M., Hendricks, G. L., Kalama, M. A., Gehad, A. E., Abbas, A. O. and Patterson P. H. (2004). Effect of heat stress on production parameters and immune responses of commercial laying hens. *Poult. Sci.* **83**, 889-894.
- Matthews, C. J., McEwan, G. T., Redfern, C. P., Thomas, E. J. and Hirst, B. H. (1998). Absorptive apical amiloride-sensitive  $Na^+$  conductance in human endometrial epithelium. *J. Physiol.* **513**, 443-452.
- Odom, T. W., Harrison, P. C. and Bottje, W. G. (1986). Effects of thermal-induced respiratory alkalosis on blood ionized calcium levels in the domestic hen. *Poult. Sci.* **65**, 570-573.
- Olson, D. M., Bielleir, H. V. and Hertelendy, F. (1978). Shell gland responsiveness to prostaglandins F<sub>2</sub> and E<sub>1</sub> and to arginine vasotocin during the laying cycle of the domestic hen (*Gallus domesticus*). *Gen. Comp. Endocrinol.* **36**, 559-565.
- Palmer-Densmore, M., Deachapunya, C., Kannan, M. and O'Grady, S. M. (2002). UTP-dependent inhibition of  $Na^+$  absorption requires activation of PKC in endometrial epithelial cells. *J. Gen. Physiol.* **120**, 897-906.
- Pearson, T. W. and Goldner, A. M. (1973). Calcium transport across avian uterus. I. Effects of electrolyte substitution. *Am. J. Physiol.* **225**, 1508-1512.
- Pearson, T. W. and Goldner, A. M. (1974). Calcium transport across avian uterus. II. Effects of inhibitors and nitrogen. *Am. J. Physiol.* **227**, 465-468.
- Pearson, T. W., Pryor, T. J. and Goldner, A. M. (1977). Calcium transport across avian uterus. III. Comparison of laying and nonlaying birds. *Am. J. Physiol.* **232**, E437-E443.
- Poggenpoel, D. G. (1986). Correlated response in shell and albumen quality with selection for increased egg production. *Poult. Sci.* **65**, 1633-1641.
- Saito, N., Sato, K. and Shimada, K. (1987). Prostaglandin levels in peripheral and follicular plasma, the isolated theca and granulosa layers of pre- and postovulatory follicles, and myometrium and mucosa of the shell gland (uterus) during a midsequence-oviposition of the hen (*Gallus domesticus*). *Biol. Reprod.* **36**, 89-96.

- Soares, J. H., Jr and Ottinger, M. A.** (1988). Potential role of 1,25 dihydroxycholecalciferol in egg shell calcification. *Poult. Sci.* **67**, 1322.
- Steward, M. C., Ishiguro, H. and Case, R. M.** (2005). Mechanisms of bicarbonate secretion in the pancreatic duct. *Annu. Rev. Physiol.* **67**, 101-133. .
- Vetter, A. E. and O'Grady, S. M.** (1996). Mechanisms of electrolyte transport across the endometrium. Regulation by  $\text{PGF}_2$  alpha and cAMP. *Am. J. Physiol.* **270**, C663-C672.
- Vetter, A. E., Deachapunya, C. and O'Grady, S. M.** (1997).  $\text{Na}^+$  absorption across endometrial epithelial cells is stimulated by cAMP-dependent activation of an inwardly rectifying  $\text{K}^+$  channel. *J. Memb. Biol.* **160**, 119-126.
- Yamamoto, T., Ozawa, H. and Nagai, H.** (1985). Histochemical studies of Ca-ATPase, succinate and  $\text{NAD}^+$ -dependent isocitrate dehydrogenases in the shell gland of laying Japanese quails: with special reference to calcium-transporting cells. *Histochem.* **83**, 221-226.
